# Supplementary material for: Repeated Exposure to Media Violence Is Associated with Diminished Response in an Inhibitory Frontolimbic Network
Source: PubMed Central journal article supplement (PMC2092389; doi:10.1371/journal.pone.0001268), 2007-12-05
Supplement: pone.0001268.s008.pdf [file pone.0001268.s008.pdf]

## Screenshots, credits, and summaries of video stimuli

### Violent Clips

|                                                                                     |                                                                                  |                                                                  |
|-------------------------------------------------------------------------------------|----------------------------------------------------------------------------------|------------------------------------------------------------------|
|    | <p><i>The Basketball Diaries</i>. Dir. Scott Kalvert. New Line Cinema: 1995.</p> | <p>A teenager breaks a bottle over another teenager's head.</p>  |
|   | <p><i>A Better Tomorrow</i>. Dir. John Woo. Cinema City: 1986.</p>               | <p>One man shoots another at point-blank range in the chest.</p> |
|  | <p><i>Wake of Death</i>. Dir. Philippe Martinez. Bauer Martinez: 2004.</p>       | <p>Two men have a fistfight.</p>                                 |
|  | <p><i>The Patriot</i>. Dir. Roland Emmerich. Columbia Pictures: 2000.</p>        | <p>A man is shot in the head.</p>                                |

|                                                                                     |                                                                               |                                                                              |
|-------------------------------------------------------------------------------------|-------------------------------------------------------------------------------|------------------------------------------------------------------------------|
|    | <p><i>A Better Tomorrow.</i><br/>Dir. John Woo.<br/>Cinema City: 1986.</p>    | <p>One man shoots at another using one gun in each hand.</p>                 |
|   | <p><i>Blade: Trinity.</i> Dir. David S. Goyer.<br/>New Line Cinema: 2004.</p> | <p>Man reaches around another's face and cuts his forehead with a knife.</p> |
|  | <p><i>Face/Off.</i> Dir. John Woo. Touchstone Pictures: 1997.</p>             | <p>Man jumps out of airplane and shoots another man in the chest.</p>        |
|  | <p><i>A Better Tomorrow.</i><br/>Dir. John Woo.<br/>Cinema City: 1986.</p>    | <p>Two men have a fistfight in the rain.</p>                                 |

|                                                                                     |                                                                           |                                                                                     |
|-------------------------------------------------------------------------------------|---------------------------------------------------------------------------|-------------------------------------------------------------------------------------|
|    | <p><i>Pulp Fiction</i>. Dir. Quentin Tarantino. Miramax: 1994.</p>        | <p>One man slashes another in the chest with a sword.</p>                           |
|    | <p><i>Face/Off</i>. Dir. John Woo. Touchstone Pictures: 1997.</p>         | <p>Man pulls another out of a car through the window, throws him on the ground.</p> |
|   | <p><i>A Better Tomorrow</i>. Dir. John Woo. Cinema City: 1986.</p>        | <p>Men engage in a mass fistfight; one swings a bat at others.</p>                  |
|  | <p><i>Kill Bill</i>. Dir. Quentin Tarantino. Miramax: 2003.</p>           | <p>Two women fight; one throws another through a glass table.</p>                   |
|  | <p><i>Blade: Trinity</i>. Dir. David S. Goyer. New Line Cinema: 2004.</p> | <p>Man delivers a strong uppercut to another.</p>                                   |

|                                                                                     |                                                                               |                                                             |
|-------------------------------------------------------------------------------------|-------------------------------------------------------------------------------|-------------------------------------------------------------|
|    | <p><i>A Better Tomorrow.</i><br/>Dir. John Woo.<br/>Cinema City: 1986.</p>    | <p>Man kicks others and hits them with a wrench.</p>        |
|    | <p><i>Braveheart.</i> Dir. Mel Gibson. 20<sup>th</sup> Century Fox: 1995.</p> | <p>Man hits another with an axe.</p>                        |
|   | <p><i>Wake of Death.</i> Dir. Philippe Martinez. Bauer Martinez: 2004.</p>    | <p>Man shoots woman in the head from point-blank range.</p> |
|  | <p><i>Gangs of New York.</i> Dir. Martin Scorsese. Miramax: 2002.</p>         | <p>Man strikes another with a meat cleaver.</p>             |



|                                                                                     |                                                                                   |                                                                        |
|-------------------------------------------------------------------------------------|-----------------------------------------------------------------------------------|------------------------------------------------------------------------|
|    | <p><i>A Better Tomorrow.</i><br/>Dir. John Woo.<br/>Cinema City: 1986.</p>        | <p>Two men engage in a fistfight, wrestle each other to the floor.</p> |
|    | <p><i>Assault on Precinct 13.</i> Dir. Jean-François Richet.<br/>Rogue: 2005.</p> | <p>One man shoots another in the head.</p>                             |
|   | <p><i>Braveheart.</i> Dir. Mel Gibson. 20<sup>th</sup><br/>Century Fox: 1995.</p> | <p>A man is beaten with a large hammer.</p>                            |
|  | <p><i>Face/Off.</i> Dir. John Woo. Touchstone Pictures: 1997.</p>                 | <p>A man is hit in the throat and face with a metal tray.</p>          |

|                                                                                     |                                                                                   |                                                                             |
|-------------------------------------------------------------------------------------|-----------------------------------------------------------------------------------|-----------------------------------------------------------------------------|
|    | <p><i>A Better Tomorrow.</i><br/>Dir. John Woo.<br/>Cinema City: 1986.</p>        | <p>Man fires at another with a shotgun, sends victim flying over table.</p> |
|    | <p><i>Pulp Fiction.</i> Dir. Quentin Tarantino.<br/>Miramax: 1994.</p>            | <p>Man shoots woman in the leg.</p>                                         |
|   | <p><i>Assault on Precinct 13.</i> Dir. Jean-François Richet.<br/>Rogue: 2005.</p> | <p>Man shoots woman in the chest.</p>                                       |
|  | <p><i>A Better Tomorrow.</i><br/>Dir. John Woo.<br/>Cinema City: 1986.</p>        | <p>Man shoots another in the chest.</p>                                     |

|                                                                                    |                                                                               |                                                                            |
|------------------------------------------------------------------------------------|-------------------------------------------------------------------------------|----------------------------------------------------------------------------|
|   | <p><i>Face/Off</i>. Dir. John Woo. Touchstone Pictures: 1997.</p>             | <p>Man fires at another with a machine gun, launching him out of boat.</p> |
|   | <p><i>Braveheart</i>. Dir. Mel Gibson. 20<sup>th</sup> Century Fox: 1995.</p> | <p>Man punches younger man in face, knocks him to the floor.</p>           |
|  | <p><i>The Patriot</i>. Dir. Roland Emmerich. Columbia Pictures: 2000.</p>     | <p>Man beats another with an axe.</p>                                      |

### Fearful Clips

|                                                                                     |                                                                                    |                                                           |
|-------------------------------------------------------------------------------------|------------------------------------------------------------------------------------|-----------------------------------------------------------|
|  | <p><i>Nightmare on Elm Street 4</i>. Dir. Renny Harlin. New Line Cinema: 1988.</p> | <p>Girl expresses dread.</p>                              |
|  | <p><i>Armageddon</i>. Dir. Michael Bay. Touchstone Pictures: 1998.</p>             | <p>Two pilots scream and are thrown about in a crash.</p> |

|                                                                                     |                                                                             |                                                                                 |
|-------------------------------------------------------------------------------------|-----------------------------------------------------------------------------|---------------------------------------------------------------------------------|
|    | <p><i>Daylight</i>. Dir. Rob Cohen. Universal Pictures: 1996.</p>           | <p>Man and woman express fear.</p>                                              |
|    | <p><i>The Devil's Rejects</i>. Dir. Rob Zombie. Lions Gate Films: 2005.</p> | <p>Woman screams, as camera zooms in on her face.</p>                           |
|   | <p><i>Daylight</i>. Dir. Rob Cohen. Universal Pictures: 1996.</p>           | <p>Woman screams, man cringes as he swerves his car.</p>                        |
|  | <p><i>Cliffhanger</i>. Dir. Renny Harlin. Canal+: 1993.</p>                 | <p>Woman expresses fear as she hangs above a canyon.</p>                        |
|  | <p><i>Twister</i>. Dir. Jan de Bont. Warner Bros: 1996.</p>                 | <p>Crowd of people scream, collapse on each other, as sparks fly near them.</p> |



|                                                                                     |                                                                                   |                                                                        |
|-------------------------------------------------------------------------------------|-----------------------------------------------------------------------------------|------------------------------------------------------------------------|
|    | <p><i>Hide and Seek</i>. Dir. John Polson. 20<sup>th</sup> Century Fox: 2005.</p> | <p>Woman screams, recoils.</p>                                         |
|    | <p><i>Superman</i>. Dir. Richard Donner. Warner Bros: 1978.</p>                   | <p>Woman screams as her car sinks into a crevice.</p>                  |
|   | <p><i>Pet Semetary</i>. Dir. Mary Lambert. Paramount Pictures: 1989.</p>          | <p>Man shrieks, recoils after a cat jumps out at him unexpectedly.</p> |
|  | <p><i>Spiderman</i>. Dir. Sam Raimi. Columbia Pictures: 2002.</p>                 | <p>Woman screams as a balcony collapses beneath her.</p>               |
|  | <p><i>Superman</i>. Dir. Richard Donner. Warner Bros: 1978.</p>                   | <p>Woman screams as she nearly falls out of helicopter.</p>            |

|                                                                                     |                                                                                       |                                                                                      |
|-------------------------------------------------------------------------------------|---------------------------------------------------------------------------------------|--------------------------------------------------------------------------------------|
|    | <p><i>The Amityville Horror</i>. Dir. Stuart Rosenberg. MGM: 1979.</p>                | <p>Woman appears from darkness and screams.</p>                                      |
|    | <p><i>Nightmare on Elm Street 5</i>. Dir. Stephen Hopkins. New Line Cinema: 1989.</p> | <p>Man recoils, expresses terror as he is about to be in a car accident.</p>         |
|   | <p><i>Aliens</i>. Dir. James Cameron. 20<sup>th</sup> Century Fox: 1986.</p>          | <p>Woman and girl express horror.</p>                                                |
|  | <p><i>Nightmare on Elm Street 5</i>. Dir. Stephen Hopkins. New Line Cinema: 1989.</p> | <p>Girl is terrified when she discovers a tarantula has crawled onto her jacket.</p> |
|  | <p><i>Thirteen Ghosts</i>. Dir. William Castle. Columbia: 1960.</p>                   | <p>Woman backs away with a scared expression on her face.</p>                        |

|                                                                                     |                                                                                       |                                                         |
|-------------------------------------------------------------------------------------|---------------------------------------------------------------------------------------|---------------------------------------------------------|
|    | <p><i>Nightmare on Elm Street 4.</i> Dir. Renny Harlin. New Line Cinema: 1988.</p>    | <p>Girl starts screaming.</p>                           |
|    | <p><i>The Texas Chainsaw Massacre.</i> Dir. Marcus Nispel. New Line Cinema: 2003.</p> | <p>Young man and woman scream.</p>                      |
|   | <p><i>Freddy's Dead.</i> Dir. Rachel Talalay. New Line Cinema: 1991.</p>              | <p>Girl is hysterically screaming and crying.</p>       |
|  | <p><i>Daylight.</i> Dir. Rob Cohen. Universal Pictures: 1996.</p>                     | <p>Woman is cringing with horrified expression.</p>     |
|  | <p><i>Superman.</i> Dir. Richard Donner. Warner Bros: 1978.</p>                       | <p>Woman is horrified as her car slips into a hole.</p> |

|                                                                                     |                                                                                       |                                                                             |
|-------------------------------------------------------------------------------------|---------------------------------------------------------------------------------------|-----------------------------------------------------------------------------|
|    | <p><i>Nightmare on Elm Street 3.</i> Dir. Chuck Russell. New Line Cinema: 1987.</p>   | <p>Girl screams.</p>                                                        |
|    | <p><i>Godzilla.</i> Dir. Roland Emmerich. Tristar: 1998.</p>                          | <p>Man is horrified and screams.</p>                                        |
|   | <p><i>Nightmare on Elm Street 5.</i> Dir. Stephen Hopkins. New Line Cinema: 1989.</p> | <p>Girl is slipping at the edge of high dive, shows fearful expression.</p> |
|  | <p><i>Daylight.</i> Dir. Rob Cohen. Universal Pictures: 1996.</p>                     | <p>Girl and two adults scream.</p>                                          |
|  | <p><i>Nightmare on Elm Street 3.</i> Dir. Chuck Russell. New Line Cinema: 1987.</p>   | <p>Girl cries and screams hysterically.</p>                                 |



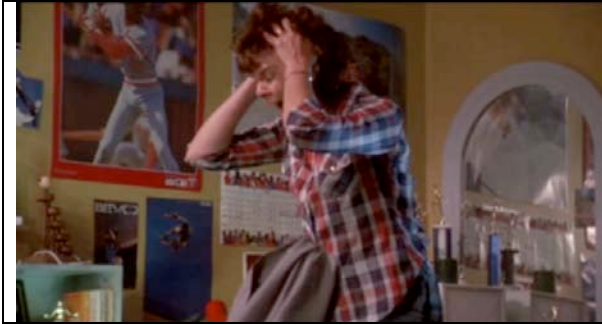

*Nightmare on Elm Street 4.* Dir. Renny Harlin. New Line Cinema: 1988.

Woman pulls back sheets, discovers something, screams in horror.

**Neutral Clips**

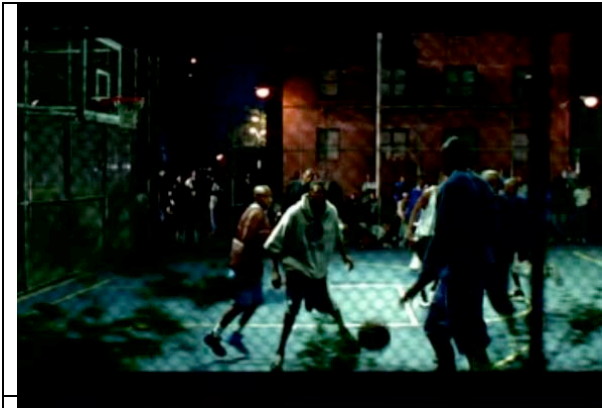

*He Got Game.* Dir. Spike Lee. Touchstone Pictures: 1998.

Men play basketball on a street court at night.

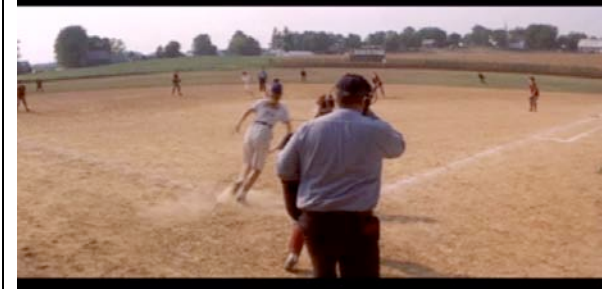

*A League of Their Own.* Dir. Penny Marshall. Columbia Pictures: 1992.

A woman hits a baseball and then starts to run toward first base.

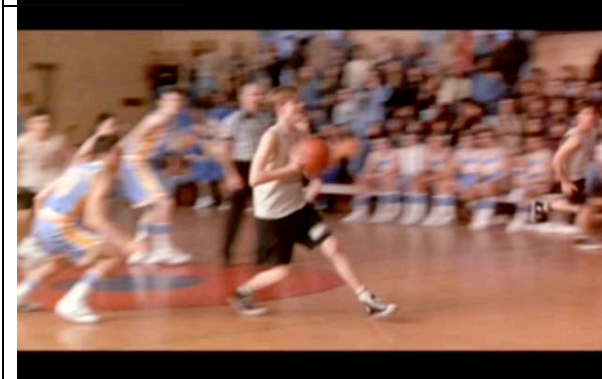

*The Basketball Diaries.* Dir. Scott Kalvert. New Line Cinema: 1995.

A boy throws the ball toward his friend at the basket, who shoots a lay-up.

|                                                                                     |                                                                                    |                                                                                     |
|-------------------------------------------------------------------------------------|------------------------------------------------------------------------------------|-------------------------------------------------------------------------------------|
|    | <p><i>The Art of War</i>. Dir. Christian Duguay. Warner Bros: 2000.</p>            | <p>Two men play basketball; one tries to block the other as he shoots the ball.</p> |
|    | <p><i>A League of Their Own</i>. Dir. Penny Marshall. Columbia Pictures: 1992.</p> | <p>Two women run after a moving train and jump onboard.</p>                         |
|   | <p><i>The Basketball Diaries</i>. Dir. Scott Kalvert. New Line Cinema: 1995.</p>   | <p>Several teenage boys play basketball at night, in the rain.</p>                  |
|  | <p><i>Hoosiers</i>. Dir. David Anspaugh. Hemdale: 1986.</p>                        | <p>Boys pass the ball around while the other team tries to block them.</p>          |

|                                                                                     |                                                                                    |                                                                                                 |
|-------------------------------------------------------------------------------------|------------------------------------------------------------------------------------|-------------------------------------------------------------------------------------------------|
|    | <p><i>A League of Their Own</i>. Dir. Penny Marshall. Columbia Pictures: 1992.</p> | <p>Consecutive shots of women sliding into a baseball plate.</p>                                |
|    | <p><i>Second String</i>. Dir. Robert Lieberman. TNT: 2002.</p>                     | <p>A player hikes the ball and then hands it off to another, as the opposing team advances.</p> |
|   | <p><i>Center Stage</i>. Dir. Nicholas Hytner. Columbia Pictures: 2001.</p>         | <p>Two young people dance at a nightclub.</p>                                                   |
|  | <p><i>The Basketball Diaries</i>. Dir. Scott Kalvert. New Line Cinema: 1995.</p>   | <p>Young boys pass a basketball to each other on an indoor court.</p>                           |
|  | <p><i>Braveheart</i>. Dir. Mel Gibson. 20<sup>th</sup> Century Fox: 1995.</p>      | <p>A man and woman run through the woods together.</p>                                          |



|                                                                                     |                                                                                    |                                                                         |
|-------------------------------------------------------------------------------------|------------------------------------------------------------------------------------|-------------------------------------------------------------------------|
|    | <p><i>Second String.</i> Dir. Robert Lieberman. TNT: 2002.</p>                     | <p>A player tries to open himself up for a pass.</p>                    |
|    | <p><i>Center Stage.</i> Dir. Nicholas Hytner. Columbia Pictures: 2001.</p>         | <p>Two people dance ballet on a stage.</p>                              |
|   | <p><i>Gangs of New York.</i> Dir. Martin Scorsese. Miramax: 2002.</p>              | <p>Several people perform a brief dance with flags and swords.</p>      |
|  | <p><i>Second String.</i> Dir. Robert Lieberman. TNT: 2002.</p>                     | <p>A man runs with a football, dodging players from the other team.</p> |
|  | <p><i>A League of Their Own.</i> Dir. Penny Marshall. Columbia Pictures: 1992.</p> | <p>A line of women plays catch with a baseball.</p>                     |



|                                                                                     |                                                                                  |                                                                                                 |
|-------------------------------------------------------------------------------------|----------------------------------------------------------------------------------|-------------------------------------------------------------------------------------------------|
|    | <p><i>The Basketball Diaries</i>. Dir. Scott Kalvert. New Line Cinema: 1995.</p> | <p>A boy shoots for the basket but is blocked by another man.</p>                               |
|    | <p><i>Center Stage</i>. Dir. Nicholas Hytner. Columbia Pictures: 2001.</p>       | <p>A man dances and kneels in front of an empty auditorium.</p>                                 |
|   | <p><i>He Got Game</i>. Dir. Spike Lee. Touchstone Pictures: 1998.</p>            | <p>An aerial shot shows a man trying to advance toward the basket while another blocks him.</p> |
|  | <p><i>Malevolence</i>. Dir. Stevan Mena. Magnetic Media: 2004.</p>               | <p>A girl swings and misses the baseball.</p>                                                   |
|  | <p><i>Footloose</i>. Dir. Herbert Ross. Paramount: 1984,</p>                     | <p>A crowd of people dance.</p>                                                                 |

|                                                                                     |                                                                                    |                                                                        |
|-------------------------------------------------------------------------------------|------------------------------------------------------------------------------------|------------------------------------------------------------------------|
|    | <p><i>He Got Game.</i> Dir. Spike Lee.<br/>Touchstone Pictures: 1998.</p>          | <p>A boy dribbles a basketball while a man walks next to him.</p>      |
|    | <p><i>The Art of War.</i> Dir. Christian Duguay.<br/>Warner Bros: 2000.</p>        | <p>A series of tight and aerial camera shots follows a basketball.</p> |
|   | <p><i>Center Stage.</i> Dir. Nicholas Hytner.<br/>Columbia Pictures: 2001.</p>     | <p>A man holds a woman as she twirls around on point.</p>              |
|  | <p><i>He Got Game.</i> Dir. Spike Lee.<br/>Touchstone Pictures: 1998.</p>          | <p>Man dribbles a basketball while another tries to block him.</p>     |
|  | <p><i>A League of Their Own.</i> Dir. Penny Marshall. Columbia Pictures: 1992.</p> | <p>A crowd of people dances.</p>                                       |

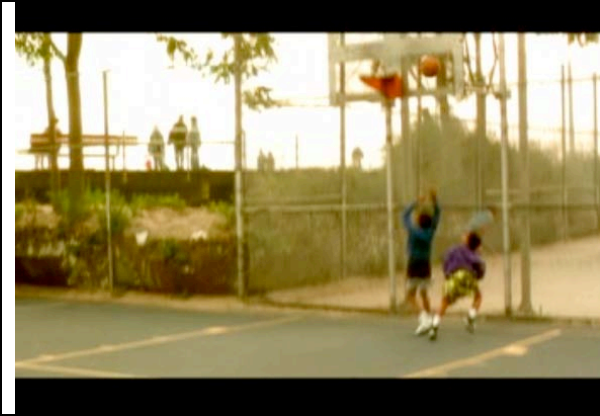

*He Got Game*. Dir.  
Spike Lee.  
Touchstone Pictures:  
1998.

Two children  
play basketball;  
one attempts to  
block the other  
as he throws the  
ball toward the  
net.
