# Supplementary material for: Repeated Exposure to Media Violence Is Associated with Diminished Response in an Inhibitory Frontolimbic Network
Source: PubMed Central journal article supplement (PMC2092389; doi:10.1371/journal.pone.0001268), 2007-12-05
Supplement: pone.0001268.s010.pdf [file pone.0001268.s010.pdf]

- 1 Some of my friends think I am a hothead
- 2 I have become so mad that I have broken things
- 3 I can't help getting into arguments when people disagree with me
- 4 Once in a while, I can't control the urge to strike another person
- 5\* I am an even-tempered person
- 6 I flare up quickly but get over it quickly
- 7 Given enough provocation, I may hit another person
- 8 When people annoy me, I may tell them what I think of them
- 9\* I can think of no good reason for ever hitting a person
- 10 I have trouble controlling my temper
- 11 When frustrated, I let my irritation show
- 12 If somebody hits me, I hit back
- 13 I sometimes feel like a powder keg ready to explode
- 14 There are people who pushed me so far that we came to blows
- 15 My friends say that I'm somewhat argumentative
- 16 Sometimes I fly off the handle for no good reason
- 17 I get into fights a little more than the average person

Each item was rated along the following axis:

1: extremely uncharacteristic of me

5: extremely characteristic of me

\* = reverse-scored

All of the questions received equal weight in computing total score.

For details on each subject's responses to these questions, as well as the variance generated by each question, please supplementary table 1.
